# Supplementary material for: DNA methylome combined with chromosome cluster-oriented analysis provides an early signature for cutaneous melanoma aggressiveness
Source: eLife journal article supplement (doi:10.7554/elife.78587), 2022-09-20
Supplement: supp [file elife-78587-supp-v1.zip]

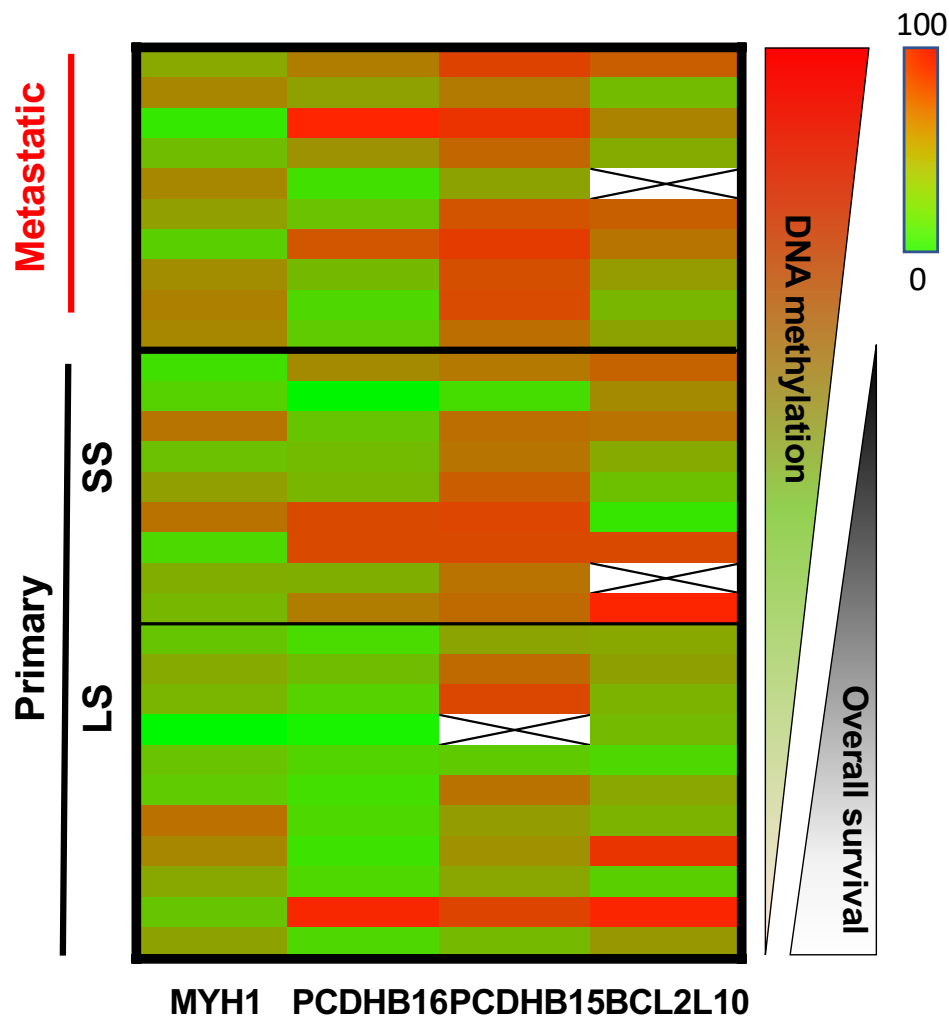

**Figure 4-Supplemental 1. Heatmap of DNA methylation of MYH1, PCDHB16, PCDHB15 and BCL2L10 in the first set of 10 metastatic melanoma patient sample and 20 primary patient melanoma.**

The median DNA methylation of the analysed CpG for each gene is indicated as percentage and overall survival in months. Primary samples are divided by a small black line indicating the cut-off at one year between the short and long overall survival (SS and LS).
