# Supplementary material for: DNA methylome combined with chromosome cluster-oriented analysis provides an early signature for cutaneous melanoma aggressiveness
Source: eLife journal article supplement (doi:10.7554/elife.78587), 2022-09-20
Supplement: supp [file elife-78587-supp-v1.zip]

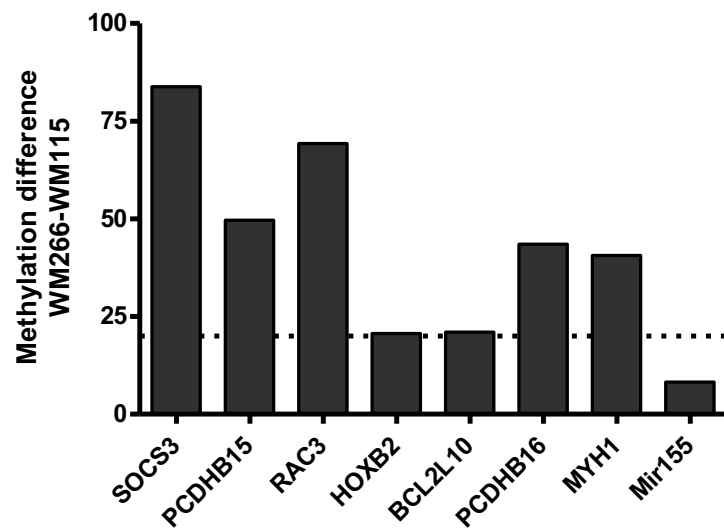

**Figure 3-Supplemental 1. Promoter hypermethylation of the candidate genes in WM266-4 vs WM115 cells.**

Hypermethylation (Methylation difference  $\geq 20\%$ : dotted line) for all candidate genes analysed by Bisulfite-Pyrosequencing.
