# Supplementary material for: DNA methylome combined with chromosome cluster-oriented analysis provides an early signature for cutaneous melanoma aggressiveness
Source: eLife journal article supplement (doi:10.7554/elife.78587), 2022-09-20
Supplement: supp [file elife-78587-supp-v1.zip]

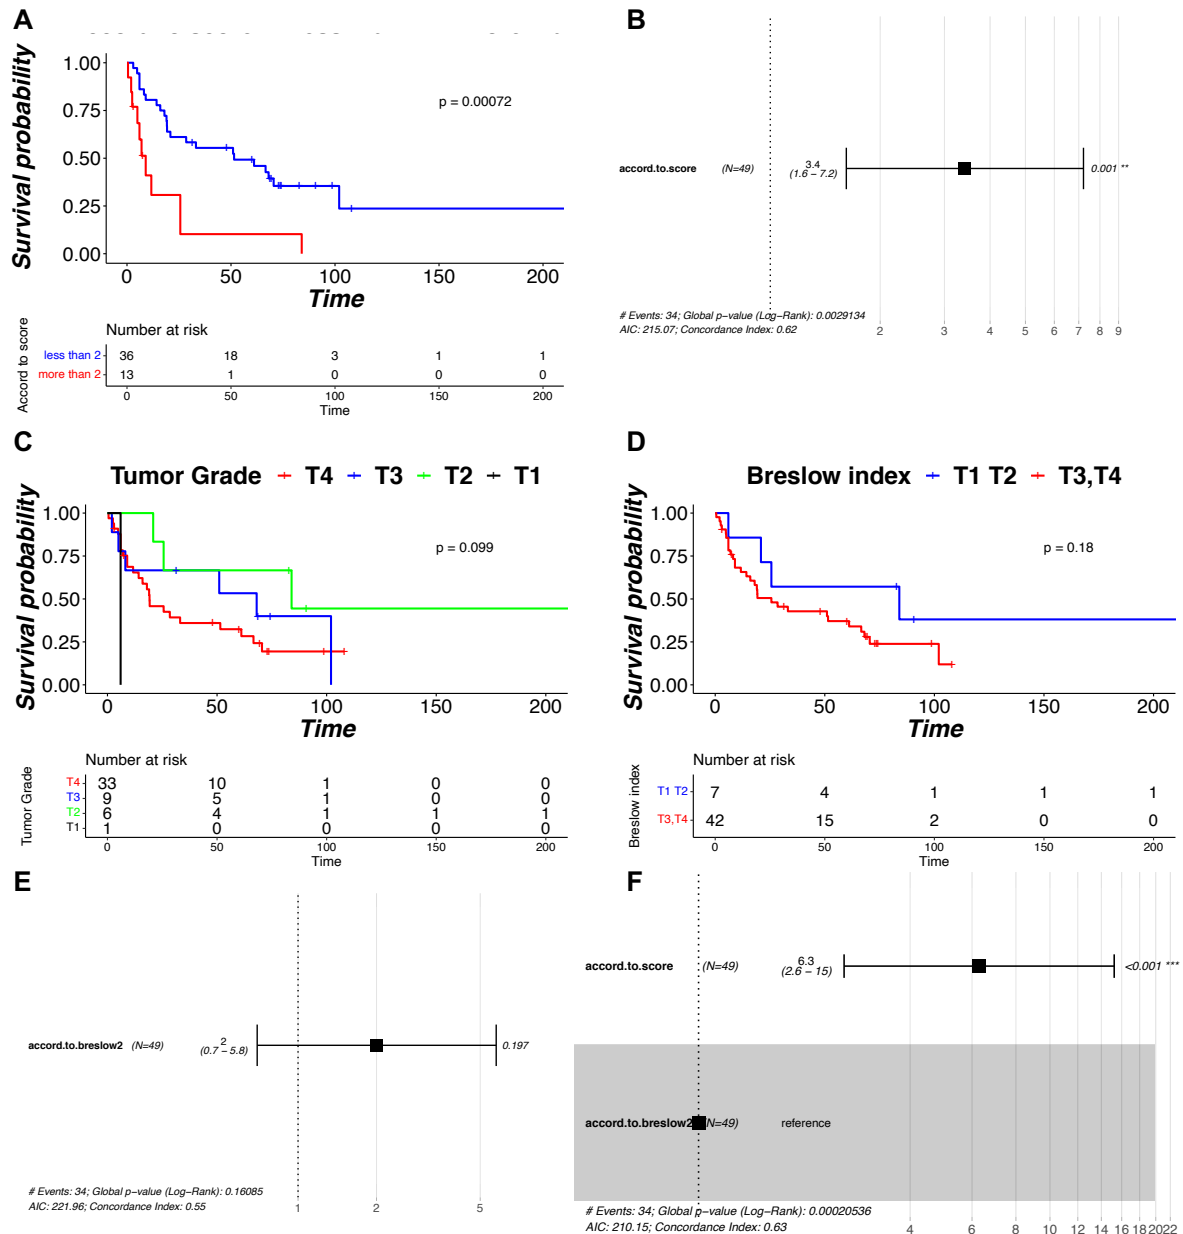

**Figure 4-Supplemental 2. The DNA methylation score is a better prognostic factor than classical used clinical parameter Breslow index.**

- Kaplan–Meier curve of patients based on the methylation score in the 49 primary melanoma samples.
- Hazard ratio plot calculated from our methylation score on the 49 primary melanoma samples.
- Kaplan–Meier curve of patients according to the primary tumor grade defined by the AJCC staging system of melanoma from Breslow index (Primary tumor T1 = less than 1mm, T2 = less than 2 mm, T3 = between 2 and 4 mm, T4 = more than 4 mm).
- Kaplan–Meier curve of patients based on the Breslow index in the 49 primary melanoma samples (less than 2 in blue: T1 and T2 grade, more than 2 in red: T3 and T4 grades).
- Hazard ratio plot calculated from Breslow index on the 49 primary melanoma samples.
- Hazard ratio plot calculated from the interaction between our methylation score and the Breslow index on the 49 primary melanoma samples.
