# Supplementary material for: DNA methylome combined with chromosome cluster-oriented analysis provides an early signature for cutaneous melanoma aggressiveness
Source: eLife journal article supplement (doi:10.7554/elife.78587), 2022-09-20

**Figure 1-Supplemental 1: Top Functions associated by IPA to the 229 hypermethylated genes in the aggressive cell lines.** Among the 229 genes, 116 were associated to IPA canonical functions. Column 1 indicates the top functions. Column 2 shows the  $-\log(p\text{-value})$  as horizontal histogram relative to the Fisher exact test ( $p < 0.05$  :  $-\log(0.05) = 1.3 = \text{threshold}$ ) used by IPA to classify the most representative functions. The score in column 3 corresponds to the number of genes among the 229 belonging to the associated function.

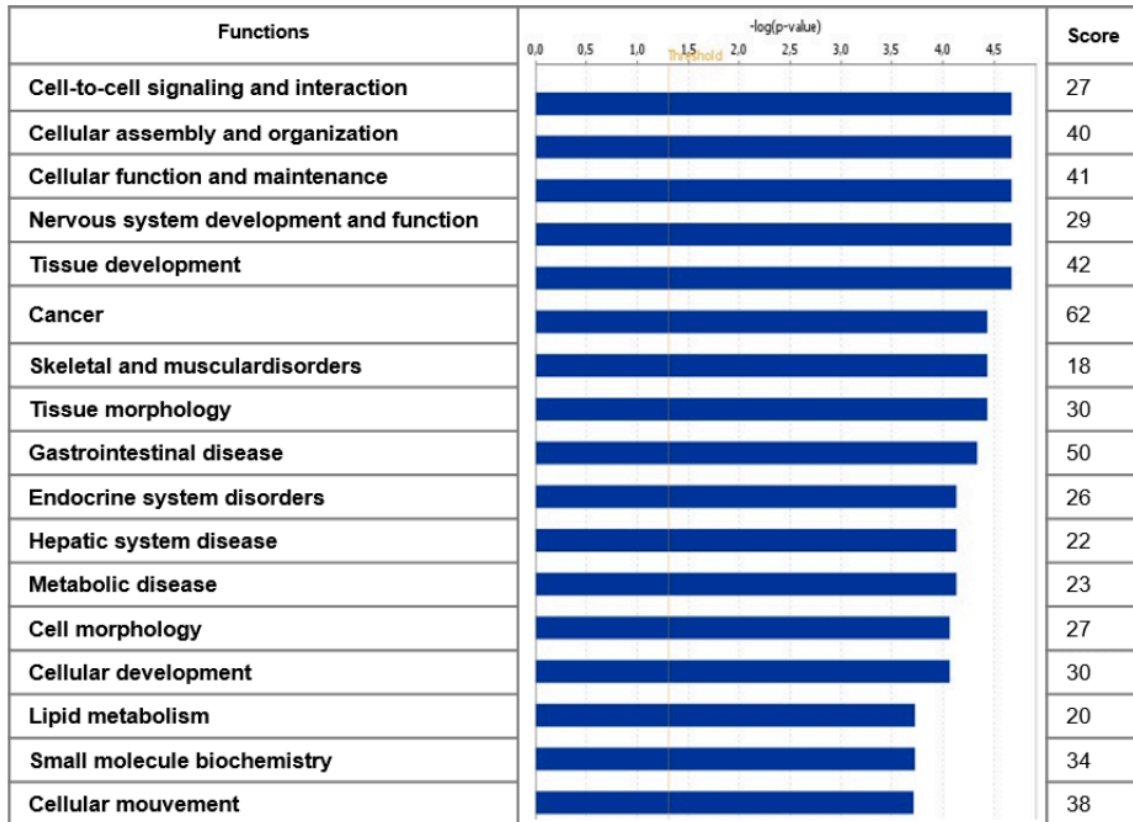

Supplement: supp [file elife-78587-supp-v1.zip]
