# Supplementary material for: DNA methylome combined with chromosome cluster-oriented analysis provides an early signature for cutaneous melanoma aggressiveness
Source: eLife journal article supplement (doi:10.7554/elife.78587), 2022-09-20
Supplement: supp [file elife-78587-supp-v1.zip]

**Figure 1-Supplemental 2: Detailed informations of the eight selected genes.**

| Gene symbol | Gene                                       | RefSeqGene | Chromosome | Methylation location | $\Delta$ methylation (%)<br>( $\beta$ WM266-4 - $\beta$ WM115)<br>x 100 | WM266-4 cells<br>promotor methylation (%) | IPA Function                                                  |
|-------------|--------------------------------------------|------------|------------|----------------------|-------------------------------------------------------------------------|-------------------------------------------|---------------------------------------------------------------|
| MYH1        | myosin, heavy chain 1                      | NM_005963  | 17         | cluster              | 75                                                                      | 82                                        | Cellular assembly and organization, cancer                    |
| SOCS3       | suppressor of cytokine signaling 3         | NM_003955  |            | Methylation peak     | 72                                                                      | 92                                        | Cancer                                                        |
| RAC3        | RAS-related C3 botulinum toxin substrate 3 | NM_005052  |            | Methylation peak     | 70                                                                      | 96                                        | Cellular assembly and organization, cancer, cellular movement |
| HOXB2       | homeobox B2                                | NM_002145  |            | chromosome           | 45                                                                      | 69                                        | Tissue development                                            |
| PCDHB15     | protocadherin beta 15                      | NM_018935  | 5          | cluster              | 45                                                                      | 85                                        | cell-to-cell signaling and interaction                        |
| PCDHB16     | protocadherin beta 16                      | NM_020957  |            | cluster              | 52                                                                      | 82                                        | cell-to-cell signaling and interaction                        |
| BCL2L10     | BCL2-like 10                               | NM_020396  | 15         | chromosome           | 46                                                                      | 73                                        | Cancer                                                        |
| Mir-155HG   | Mir-155 Host Gene                          | NR_001458  | 21         | other                | 32                                                                      | 74                                        | Cancer                                                        |
