# Supplementary material for: DNA methylome combined with chromosome cluster-oriented analysis provides an early signature for cutaneous melanoma aggressiveness
Source: eLife journal article supplement (doi:10.7554/elife.78587), 2022-09-20
Supplement: supp [file elife-78587-supp-v1.zip]

**Figure 2-Supplemental 3: List of the 74 hypermethylated genes found on six chromosomes bearing at least one cluster.**

| Gene name         | Ensembl gene ID  | Chromosome |
|-------------------|------------------|------------|
| CD74              | ENSG00000019582  | 5          |
| FER               | ENSG000000151422 | 5          |
| MRPL36            | ENSG000000171421 | 5          |
| NKD2              | ENSG000000145506 | 5          |
| PCDHB10           | ENSG000000120324 | 5          |
| PCDHB13           | ENSG000000187372 | 5          |
| PCDHB14           | ENSG000000120327 | 5          |
| PCDHB15           | ENSG000000113248 | 5          |
| PCDHB16           | ENSG000000196963 | 5          |
| PCDHB18           | ENSG000000146001 | 5          |
| PCDHB7            | ENSG000000113212 | 5          |
| PCDHB9            | ENSG000000120324 | 5          |
| SDHAP3            | ENSG000000185986 | 5          |
| TNFAIP8           | ENSG000000145779 | 5          |
| ZDHHC11           | ENSG000000188818 | 5          |
| BAG2              | ENSG000000112208 | 6          |
| BAT4              | ENSG000000204438 | 6          |
| CSNK2B            | ENSG000000204435 | 6          |
| HIST1H3I          | ENSG000000182572 | 6          |
| HSPA1L            | ENSG000000204390 | 6          |
| IL17A             | ENSG000000112115 | 6          |
| KIAA1949          | ENSG000000146112 | 6          |
| MDC1              | ENSG000000137337 | 6          |
| NRM               | ENSG000000137404 | 6          |
| NT5E              | ENSG000000135318 | 6          |
| OR12D2            | ENSG000000168787 | 6          |
| PRR3              | ENSG000000204576 | 6          |
| RGL2              | ENSG000000237441 | 6          |
| TCF19             | ENSG000000137310 | 6          |
| TRIM26            | ENSG000000234127 | 6          |
| ZNF389            | ENSG000000226314 | 6          |
| C10orf53;C10orf53 | ENSG000000178645 | 10         |
| CYP2E1            | ENSG000000130649 | 10         |
| DNA2              | ENSG000000138346 | 10         |
| DOCK1             | ENSG000000150760 | 10         |
| FAM196A           | ENSG000000188916 | 10         |
| KIAA1598          | ENSG000000187164 | 10         |
| ANKDD1A           | ENSG000000166839 | 15         |
| BCL2L10           | ENSG000000137875 | 15         |
| C15orf2           | ENSG000000185823 | 15         |
| CHRNA3            | ENSG000000080644 | 15         |
| CSNK1A1P          | ENSG000000223518 | 15         |
| FBXL22            | ENSG000000197361 | 15         |
| GCHFR             | ENSG000000137880 | 15         |
| PIF1              | ENSG000000140451 | 15         |
| RCCD1             | ENSG000000166965 | 15         |
| SNORD115-15       | ENSG000000201679 | 15         |
| SNORD115-21       | ENSG000000199833 | 15         |
| SNORD115-42       | ENSG000000201143 | 15         |
| BOLA2             | ENSG000000183336 | 16         |
| BOLA2B            | ENSG000000169627 | 16         |
| GIYD1             | ENSG000000132207 | 16         |
| GIYD2             | ENSG000000181625 | 16         |
| SPIRE2            | ENSG000000204991 | 16         |
| SULT1A3           | ENSG000000261052 | 16         |
| SULT1A4           | ENSG000000213648 | 16         |
| ZNRF1             | ENSG000000186187 | 16         |
| CNTNAP1           | ENSG000000108797 | 17         |
| FAM20A            | ENSG000000108950 | 17         |
| FASN              | ENSG000000169710 | 17         |
| HOXB2             | ENSG000000173917 | 17         |
| HOXB6             | ENSG000000108511 | 17         |
| LOC440461         | ENSG000000267472 | 17         |
| MYH1              | ENSG000000109061 | 17         |
| MYH13             | ENSG000000006788 | 17         |
| MYH2              | ENSG000000125414 | 17         |
| MYH4              | ENSG000000264424 | 17         |
| MYH8              | ENSG000000133020 | 17         |
| PHF12             | ENSG000000109118 | 17         |
| RAC3              | ENSG000000169750 | 17         |
| SOC3              | ENSG000000184557 | 17         |
| SPAG7             | ENSG000000091640 | 17         |
| TMEM88            | ENSG000000167874 | 17         |
| ZFP3              | ENSG000000180787 | 17         |
