# Supplementary material for: DNA methylome combined with chromosome cluster-oriented analysis provides an early signature for cutaneous melanoma aggressiveness
Source: eLife journal article supplement (doi:10.7554/elife.78587), 2022-09-20
Supplement: supp [file elife-78587-supp-v1.zip]

**Figure 2-Supplemental 2 - Clusters of hypermethylated genes identified by the oriented strategy.** Nine methylation clusters containing 29 genes on six chromosomes.

| Cluster | Gene Name        | Ensembl Gene ID | EntrezGene ID | chromosome | Ref Seq Genes Position |           |
|---------|------------------|-----------------|---------------|------------|------------------------|-----------|
|         |                  |                 |               |            | Start (bp)             | end (bp)  |
| 1       | SDHAP3           | ENSG00000185986 | 728609        | 5          | 1572073                | 1594646   |
|         | MRPL36           | ENSG00000171421 | 64979         | 5          | 1798499                | 1799956   |
|         |                  |                 |               |            |                        |           |
| 2       | PCDHB16          | ENSG00000196963 | 57717         | 5          | 140561265              | 140565796 |
|         | PCDHB9           | ENSG00000120324 | 56127         | 5          | 140566893              | 140571111 |
|         |                  |                 |               |            |                        |           |
| 3       | PCDHB13          | ENSG00000187372 | 56123         | 5          | 140593491              | 140596993 |
|         | PCDHB14          | ENSG00000120327 | 56122         | 5          | 140601898              | 140605860 |
|         | PCDHB18          | ENSG00000146001 | 54660         | 5          | 140613938              | 140617101 |
|         | PCDHB15          | ENSG00000113248 | 56121         | 5          | 140624917              | 140627801 |
|         |                  |                 |               |            |                        |           |
| 4       | KIAA1949/PPP1R18 | ENSG00000146112 | 170954        | 6          | 30644166               | 30655672  |
|         | NRM              | ENSG00000137404 | 11270         | 6          | 30655824               | 30659197  |
|         | MDC1             | ENSG00000137337 | 9656          | 6          | 30667584               | 30685458  |
|         |                  |                 |               |            |                        |           |
| 5       | BAT4/GPANK1      | ENSG00000204438 | 7918          | 6          | 31629006               | 31633407  |
|         | CSNK2B           | ENSG00000204435 | 1460          | 6          | 31633657               | 31637843  |
|         |                  |                 |               |            |                        |           |
| 6       | DOCK1            | ENSG00000150760 | 1793          | 10         | 128594023              | 129250780 |
|         | FAM196A          | ENSG00000188916 | 642938        | 10         | 128933690              | 128994422 |
|         |                  |                 |               |            |                        |           |
| 7       | SNORD115-15      | ENSG00000201679 | 100033453     | 15         | 25451409               | 25477615  |
|         | SNORD115-21      | ENSG00000199833 | 100033603     | 15         | 25453230               | 25453310  |
|         | SNORD115-42      | ENSG00000201143 | 100033816     | 15         | 25492492               | 25492573  |
|         |                  |                 |               |            |                        |           |
| 8       | BOLA2            | ENSG00000183336 | 552900        | 16         | 29464914               | 29466285  |
|         | BOLA2B           | ENSG00000169627 | 654483        | 16         | 29464914               | 29466285  |
|         | GIYD1/SLX1A      | ENSG00000132207 | 548593        | 16         | 29465822               | 29469545  |
|         | GIYD2            | ENSG00000181625 | 79008         | 16         | 29465822               | 29469545  |
|         | SULT1A3          | ENSG00000261052 | 6818          | 16         | 29471207               | 29476301  |
|         | SULT1A4          | ENSG00000213648 | 445329        | 16         | 29471207               | 29476301  |
|         |                  |                 |               |            |                        |           |
| 9       | MYH13            | ENSG00000006788 | 8735          | 17         | 10204183               | 10276322  |
|         | MYH8             | ENSG00000133020 | 4626          | 17         | 10293642               | 10325267  |
|         | MYH4             | ENSG00000264424 | 4622          | 17         | 10346608               | 10372876  |
|         | MYH1             | ENSG00000109061 | 4619          | 17         | 10395627               | 10421859  |
|         | MYH2             | ENSG00000125414 | 4620          | 17         | 10424465               | 10453017  |
