# Supplementary material for: DNA methylome combined with chromosome cluster-oriented analysis provides an early signature for cutaneous melanoma aggressiveness
Source: eLife. 2022 Sep 20;11:e78587. doi: 10.7554/eLife.78587 (PMC9525058; doi:10.7554/eLife.78587)
Supplement: Supplementary file 1. [file elife-78587-supp1.xls]

## Sheet: Sheet0
© 2000-2013 Ingenuity Systems, Inc. All rights reserved.
ID	Molecules in Network	Score	Focus Molecules	Top Functions
1	ACP1 (includes EG:11431),ACTA1,Actin,AKAP5,Ampa Receptor,Calcineurin A,Calcineurin protein(s),Calmodulin,CD74,Ck2,Collagen(s),CSRP2,EPHB6,ERK1/2,F Actin, HOXB6,LAMB1,Laminin,MAP9,MEF2,mir-1908,MYH1,MYH2,MYH4,MYH8,MYH13,MYL5,Myosin2,Myosin,NT5E,PDGF BB,PLCB3,Pp2b,RUSC1,SSH1	34	20	Organ Morphology, Skeletal and Muscular System Development and Function, Skeletal and Muscular Disorders
2	Alpha catenin,AMOTL1,BCR (complex),CASP1,CHRNA1,CHRNA3,Cyclin A,DFFB,E2f,ERRFI1,FABP5,Fcer1,FER,Gm-csf,Growth hormone,HOXC6,Ifn,IFN Beta,Ige,IGFBP2,IL12 (complex), LDL,MAP2K1/2,MIR155HG,MSC,MX1,NFkB (complex),Nicotinic acetylcholine receptor,PRDX1,RGL2,RIC3,RRAS2,SOCS3,Tgf beta,TNFAIP8	31	19	Cancer, Gastrointestinal Disease, Cellular Development
3	ADCY,Akt,ALT,AMPK,Ap1,APOD,CAV1,CDK14,Cg,Collagen Alpha1,CPT1,Creb,CRH,CYP27B1,CYP2E1,Cytochrome c,FADS1,FASN,FJX1,FSH,HDL,HDLBP,Insulin,LEP,Lh,LPL,N-cor,NADPH oxidase,Nr1h,PACS2,POSTN,Pro-inflammatory Cytokine,PTPase,TPTE/TPTE2,TSH	23	15	Lipid Metabolism, Small Molecule Biochemistry, Endocrine System Disorders
4	26s Proteasome,CD3,CTPS1,G protein alphai,GNRH,Gsk3,HIST1H3A (includes others),Histone h3,Histone h4,HOXC8,Hsp70,HSPA1L,Jnk,JUN,KCNC2,LPAR1,Pdgfr,PI3K (complex),Pka,Pkc(s),PLC,RAC3,Rac,Ras,RNA polymerase II,SHC1,SLC26A5,SPAG7,SPDYA,STAT,TPH1,TRPA1,Vegf,voltage-gated calcium channel,ZDHHC11	23	15	Connective Tissue Development and Function, Embryonic Development, Organ Development
5	ATG4B,ATP5J2-PTCD1/PTCD1,ATXN10,BRCA1,CHCHD1,DNA2,DPYD,ICT1,IGF2BP2,INTS1,MALSU1,MAP1LC3A,MDC1,MRPL47,MRPL48,MRPL55,MRPL,MRPL16 ,MRPL22 ,MRPL27,MRPL36,MRPL50,MRPS2,MRPS11,MRPS30,MRPS18A,MRPS28 ,MRPS5,NKD2,POTEM ,PUSL1,RPUSD3,SULT1A3/SULT1A4,UBC,ZNRF1	21	14	Cellular Assembly and Organization, Developmental Disorder, Drug Metabolism
6	beta-estradiol,C11orf10,CCDC82,CHCHD8,CHST2,CPA2 (includes EG:1358),CWC25 (includes EG:33460),DLG4,DSCR3,FAM20A,FOXA1,GCHFR,GINS3,GPANK1,HNF4A,HOXB2,HOXC5,HOXC13,HSF1 (includes EG:15499),LRRC4C,MAPK1,MRPL18,MSRB2,NUDT6,PBX1,PLXDC1,PRDM15,PRR3,RCAN3,SSR2,TCF19,TEX15,TMEM245,VAMP5,ZNF577	21	14	Embryonic Development, Organismal Development, Cell Death and Survival
7	AP5Z1,BCL2L10,BOLA2/BOLA2B,CATSPERB,CCDC36,CCDC109B,CNDP2,COX15,COX5B,COX7B,CRIM1,DHDDS,DNAJB3,DNAJC16,DNAJC22,DNAJC28,FAM111A,FAM98B,GRAMD1A,HSPA2,KCTD14,KLHL28,MIDN,NAPEPLD,PHF12,PKD1,RASSF6,SFXN3,TEX30,THG1L,UBC,VPS13B,VSTM2A,ZFHX4,ZNF711	19	13	Developmental Disorder, Hereditary Disorder, Lipid Metabolism
8	Akr1b10,AKR7A3,aldehyde reductase,Aldr2,Aldr3,Aldr4,ALX3,ANXA3,BIN3,BLCAP,Ca2+,CEBPD,CLDN18,D-glucose,ESR1,FPR3,GPR116,GPR160,HCRTR1,HCRTR2,IPMK,LGR4,NAALADL2,NFYB,NKX2-1,NMUR2,PITPNM3,RSPO2,SLC39A8,SLC5A12,SYT5,testosterone,TMEM218,TRIM26,ZSCAN1	17	12	Nervous System Development and Function, Cellular Assembly and Organization, Developmental Disorder
9	ADNP2,BTBD1,CBX1,CDH18,CLIP3,COPS6,CSNK1A1L,CTNNA1,DCAF4,DIS3L2,EPHB4,FAM83H,FAM84B,FBXO17,FBXO22,FBXW9,FMNL2,IAH1,KLHL8,KLHL15,LRRC14,MPDZ,MYEOV2,NRM,OR2AG1,RCCD1,STEAP2,STEAP4,TNRC18,UBC,ZIC4,ZNF382,ZNF598,ZNF667,ZYG11B	15	11	Cellular Assembly and Organization, Cellular Function and Maintenance, Connective Tissue Disorders
10	ARHGAP8/PRR5-ARHGAP8,BAG2,COL6A5,COL8A1,collagen,Collagen type I,DOCK1,Endothelin,ERK,estrogen receptor,Focal adhesion kinase,Gpcr,HBE1,HCK,Hsp90,IgG,IL1,IL12 (family),IL17A,Immunoglobulin,Integrin,Interferon alpha,LRAT,Mapk,Mmp,MX2,P38 MAPK,p85 (pik3r),PCDHB14,Pdgf (complex),PP2A,SRC (family),STAT5a/b,TCR,Tnf	15	11	Cellular Assembly and Organization, Hereditary Disorder, Lipid Metabolism
11	ADRB2,ANKRD13D,AQP11,ARNT2,BAI3,BRS3,C11orf82,CLEC4D,CSNK2B,CUL1,DGCR6,EGFR,FBXO42,FFAR3,FGFRL1,GGN,GPR35,GPR87,GPR126,GPR176,KIAA1598,LPAR3,mir-324,miR-1913,MOB3A,NAALAD2,NEDD4,NMBR,SLX1A/SLX1B,Tcte3 (includes others),TNF,TP53 ,TRIM44,USP29,VIPR2	13	10	Cancer, Tumor Morphology, Cell Death and Survival
12	ABCA12,ANKRD6,APC-AXIN-CK1-GSK3β,APC-AXIN-CK1a-CTNN, β-GSK3β,APIP,ASAH2,BNIP2,CDC42,CDC42SE1,ceramidase,ceramide,CLEC3B,CNTNAP1,CSNK1E,DAAM1,ERBB2,FAM83D,GSK3B,HEPH,NAAA,NRBP1,PAR3-PAR6-aPKC,PPP1R18,SDCCAG3,SH3D19,SH3YL1,SPTBN4,TENC1,THSD1,TIAM2,TRAF1,VIM,WSB2,WTIP,ZNF227	9	8	Cellular Development, Cellular Growth and Proliferation, Nervous System Development and Function
13	CLSTN3,MED13	2	1	Cell Signaling, Gene Expression, Infectious Disease
14	NOBOX,ZAR1	2	1	Cell Death and Survival, Reproductive System Disease, Cellular Compromise
15	Gat,SIX5,SLC6A13	2	1	Connective Tissue Disorders, Hereditary Disorder, Amino Acid Metabolism
