# Supplementary material for: DNA methylome combined with chromosome cluster-oriented analysis provides an early signature for cutaneous melanoma aggressiveness
Source: eLife. 2022 Sep 20;11:e78587. doi: 10.7554/eLife.78587 (PMC9525058; doi:10.7554/eLife.78587)
Supplement: Supplementary file 2. [file elife-78587-supp2.xls]

## Sheet: version final
Gene Name	RefSeqGene	Target genomic sequence	Illumina probe ID	PCR Bisulfite Primers	Sequencing Primers
BCL2L10	NM_020396	CCATGGTCCGGCCTYTGCTGGGGGGCCG1GGCCTTCG2CTGGTTTTCTTGGCCCG3GCCG4CG5CCTCCCCCAGGGTAGGGCTGCCG6TGCCCCG7CCCCG8GCCCCCG9GCCCCCG10GCCCCCG11GTATATTGTTTTTCAGGACTGAGAGAAGAGCCTTTGATGGGAATCCCACCTGCACCTGTTCCAGTCCYCAAGGCAAGGCCTGGTGGTGCG12CACG13TGTTCG14CG15TAGCAATCAGATGCACTGTGAGACTCGGGTTA	5/cg04519487	BCL2L10_300f21	BCL2L10_AMP1_pyro1f14
			6/cg12067522	5'-TTATGGTTYGGTTTTTGTTGG-3'	5'-TTTTGTTGGGGGGT-3'
			9/cg14431573	BCL2L10_548_9r24
			10/cg19114050	Biotin-5'-TAACCCRAATCTCACAATACATCT-3'
				BCL2L10_293f25
				TGGTTAATTATGGTTYGGTTTTTGT
				BCL2L10_455_9r23
				Biotine-CCCATCAAAAACTCTTCTCTCAA
miR-155HG	NR_001458	GAGAAAGGGAAAGGGGAAAACACCAACTACCCG1GGCG2CTGGGCTTTTTCG3ACTTTTCCTTTAAAAAGAAAAAAGTTTTTCAAGCTGTAGGTTCCAAGAACAGGCAGGAGGGGGGAGAAGGGSGGGGGGGTTGCAGAAAAGGCG4CCTGGTCG5GTTATGAGTCACAAGTGAGTTATAAAAGGGTCG6CACG7TTCG8CAGGCG9CG10GGCTTCCTGTGCG11CG12GCCG13AGCC CG14GGCCCAGCG15CCG16CCTGCAGCCTCGGGAAGG	4/cg17265380	MIR155HG_360f20	MIR155HG_AMP1_pyro1f14
			6/cg17297071	5'-GAGAAAGGGAAAGGGGAAAA-3'	5'-GGAAAGGGGAAAAT-3'
			12/cg23433889	MIR155HG_616_9r20	MIR155HG_AMP1_pyro2f14
				Biotin-5'-TCCCTTCCCRAAACTACAAA-3'	5'-GGGGTTGTAGAAAA-3'
					MIR155HG_AMP1_pyro3f19
					5'-ATAAGTGAGTTATAAAAGG-3'
SOCS3	NM_003955	GGTAGGGAGGGGACAGGAGAAGCCCG1AAGGCCCCAGCCG2GAGTATTCCS3GGAACCTGGGATCTCCG4GCTTCCATCCG5CTCTGCCCCTACCTCG6TCACCTCCCTGCCGGGAATGACCCGGGAAGGGGAGGGGAAACCGGGAAAAGCTCCCGGGACTGAGCGAGACCCCTCCCCACGCCGCGCTCCTCCTTCCTACCTGGTCCCGAATCGAAGTCTCCGTCCTTGGGGCTGAGCCCCC	4/cg26747885	SOCS3_371f23	SOCS3_AMP1_pyro1f18
				GTAGGGAGGGGATAGGAGAAGTT	GAGGGGATAGGAGAAGTT
				SOCS3_606_9r21
				Biotine-AAAAAACTCAACCCCAAAAAC
PCDHB15	NM_018935	GGGGATGGCAGGAAATACCCAGAGCTGGTGCTGGACACAGAAYTGGATCG1CG2AGGAGCAGGCCG3AGCTCMGATTAACCTTGACAGCG4GTGGACG5GTGGCTCTCCAYCCCG6ATCTGGCACCG7TCCAGATCCTCATCTTGGTCTTGGACG8CCAAWGACAATGCCCCG9GAGTTTGTGCAGGCG10CTCTACG11AGGTGCAGRTCCCAGAGAACAGCCCAGTAGGCTCCCTAGTTGTCAAGGTCTCYGCTAGGGATTTAGACACTGGGACAA	1/cg27328673	PCDHB15_399f25	PCDHB15_AMP1_pyro1f20
			5/cg23974473	GGGGATGGTAGGAAATATTTAGAGT	TGGTGTTGGATATAGAATTG
			8/cg09135656	PCDHB15_663_9r25	PCDHB15_AMP1s_pyro1r15
				Biotine-TTATCCCAATATCTAAATCCCTAAC	RAAATAAAAAACCAC
				PCDHB15_416_9f25	PCDHB15_AMP1_pyro2f14
				Biotine-TTTAGAGTTGGTGTTGGATATAGAA	GGAGTTTGTGTAGG
				PCDHB15_543r25
				CCAAAACCAAAATAAAAATCTAAAC
				PCDHB15_520f25
				TTTAGATTTTTATTTTGGTTTTGGA
				PCDHB15_679_9r30
				Biotine-TATAATATCTCTCCATTTATCCCAATATCT
PCDHB16	NM_020957	TCTTTCAGGAAAGTGCACTCTTCTCCTGCAGGTGGTGGACG1TGAATSACAATCCCCCMCAGBTGACCATGTCTGCACTCACCAGCCCCATCBCAGAGAACTCG2CCWGAGAYAGTAGTTGCTGTTTTCAGCG3TTTCAGATCCTGACTCCG4GAAACAATGGGAAGACG5ATKTCCTCCATCCAGGAAGACCTTCCCTTTCTTCTAAAACCTTCAGTCAAGAACTTTTACACCTTGGTAACG6GAGAGAGCACTCG7ACAGAGAAGCAAGASCTGAATAYRATATCACCCTCACCG8TCACAGATATGGGGACTCCAAGGC	1/cg00269800	PCDHB16_372f25	PCDHB16_AMP1_pyro2f20
			2/cg01248745	TTTTTTAGGAAAGTGTATTTTTTTT	TTATTAGTTTTATTTTAGAG
			3/cg20730770	PCDHB16_685_9r25
				Biotine-ACCTTAAAATCCCCATATCTATAAC
				PCDHB16_392f19
				TTTTTTTGTAGGTGGTGGA
				PCDHB16_590_9r26
				Biotine-TTCTTAACTAAAAATTTTAAAAAAAA
MYH1	NM_005963	CTCATATTGGGTTAAGTATATGAATCAATCTCCTATAAATRATTTGAGTCG1TTGGCAATCTTAAAGTTGTTGGCCTTTGGAATGTAAGGTGTTGTTTCAAAGACAGCTAAGTTCTGGAATCCCTGGACTTTGTTGCCTACTGCTCTTCTGTTTCACAGAGTCG2CCTGTGTGAAGTCTTTTCAACTGCCTGCG3CAGTTACAGATAGTGTACTCG4GGAGGAAAACTTCTGCTCTTTAGC	1/cg25650956	MYH1_512_9f30	MYH1_AMP1_pyro1r17
			2/cg16842280	Biotine-TTTATATTGGGTTAAGTATATGAATTAATT	AAAAACAAAAATTTTCC
				MYH1_748r25	MYH1_AMP1s_pyro1f18
				ACTAAAAAACAAAAATTTTCCTCCC	TTGGATTTTGTTGTTTAT
				MYH1_512_9f30	MYH1_AMP1_pyro3r20
				Biotine-TTTATATTGGGTTAAGTATATGAATTAATT	CCAACAACTTTAAAATTACC
				MYH1_651r25
				ATAAACAACAAAATCCAAAAATTCC
				MYH1_601f29
				TGTTGTTTTAAAGATAGTTAAGTTTTGGA
				MYH1_748_9r25
				Biotine-ACTAAAAAACAAAAATTTTCCTCCC
RAC3	NM_005052	CCTGGCTCACCTGGAGGACAAGCTGAGACTGCTGG CG1CAGGCACG2GGACG3AGGCG4CAGGGCG5CTTGCCTACAGCAGAAGCAGGTGGTGGCCG6AGGCCCMGACCCG7GGTCAGCCAGCTGGGCCTGCAAGTTGAGGGCCTGCG8GCG9GCG10CCTGGAAGAGCTGCAGCAGGTAGGCG11GGGCTCCG12GTGGGGGGCCC CG13GGCG14TGCTAGCCCCCAACCCTCG15CCTCACTCCCCAGCCTTCG16TGCCTGGCAGGAGCTGAGCCTCAAGGACCAGGAAAGGGTG	none	RAC3_422f25	RAC3_ AMP1_pyro2f17
				TTTGGTTTATTTGGAGGATAAGTTG	GGTTTGTAAGTTGAGGG
				RAC3_697_9r25
				Biotine-CACCCTTTCCTAATCCTTAAAACTC
HOXB2	NM_002145	CCTTTATAATTGTATATTGCTGATAAATACAAGCG1TATGGGGACTCTCTCTATTAAACCCAGGACTCCAGCG2AAATTACAGGGAATTCG3TGGTCACG4GGACCG5GCCTCCG6CCAATCG7CTCG8TCTGGGCCTGGTGGAAAACAGAGAGCATTATTTSGTTTAATTGATTCAAAAACASCAGAGGACCACG9ACCAGGACACCATGAGCCCCCATTCCTACACCAGTGCCTCACATGCTCTCTCCCCAATGCCTCCG10TTTCTCCAGAAAAGCTAGAGGAACCTTTTCCTCATCCCCTTCG11AAGGTTAGAAGGTTTCAGAAGCCTGGAAAAGAAGAGAC	1/cg26841048	HOXB2_179f30	HOXB2_AMP1_pyro1f20
			2/cg09313705	TTTTTATAATTGTATATTGTTGATAAATAT	ATATTGTTGATAAATATAAG
			4/cg22777724	HOXB2_512_9r27	HOXB2_AMP1_pyro3f18
			5/cg22807449	Biotine-ATCTCTTCTTTTCCAAACTTCTAAAAC	AAATAGAGAGTATTATTT
			7/cg23530553		HOXB2_AMP1_pyro4f20
			9/cg06942183		ATTTTTATATTAGTGTTTTA
			11/cg10381440
CG in bold types correspond to CG analysed by bisulfite pyrosequencing
Numbered CG correspond to CG that were found hypermethylated (>20%) in the WM266-4 vs WM115 cells by the Illumina 450K bead chip approach. The corresponding Illumina probes ID are indicated.

## Sheet: version 1
Gene Name	Ensembl Gene ID	Target sequence	Illumina probe ID	PCR Primers	Sequencing Primers
BCL2L10	ENSG00000137875	CCATGGTCCGGCCTYTGCTGGGGGGCCGGGCCTTCGCTGGTTTTCTTGGCCCGGCCGCGCCTCCCCCAGGGTAGGGCTGCCGTGCCCCGCCCCGGCCCCCGGCCCCCGGCCCCCGGTATATTGTTTTTCAGGACTGAGAGAAGAGCCTTTGATGGGAATCCCACCTGCACCTGTTCCAGTCCYCAAGGCAAGGCCTGGTGGTGCGCACGTGTTCGCGTAGCAATCAGATGCACTGTGAGACTCGGGTTA	cg04519487	BCL2L10_300f21	BCL2L10_AMP1_pyro1f14
			cg12067522	5'-TTATGGTTYGGTTTTTGTTGG-3'	5'-TTTTGTTGGGGGGT-3'
			cg14431573	BCL2L10_548_9r24
			cg19114050	Biotin-5'-TAACCCRAATCTCACAATACATCT-3'
miR-155HG	ENSG00000234883	GAGAAAGGGAAAGGGGAAAACACCAACTACCCGGGCGCTGGGCTTTTTCGACTTTTCCTTTAAAAAGAAAAAAGTTTTTCAAGCTGTAGGTTCCAAGAACAGGCAGGAGGGGGGAGAAGGGSGGGGGGGTTGCAGAAAAGGCGCCTGGTCGGTTATGAGTCACAAGTGAGTTATAAAAGGGTCGCACGTTCGCAGGCGCGGGCTTCCTGTGCGCGGCCGAGCCCGGGCCCAGCGCCGCCTGCAGCCTCGGGAAGGGA	cg17265380	MIR155HG_360f20	MIR155HG_AMP1_pyro1f14
			cg17297071	5'-GAGAAAGGGAAAGGGGAAAA-3'	5'-GGAAAGGGGAAAAT-3'
			cg23433889	MIR155HG_616_9r20	MIR155HG_AMP1_pyro2f14
				Biotin-5'-TCCCTTCCCRAAACTACAAA-3'	5'-GGGGTTGTAGAAAA-3'
					MIR155HG_AMP1_pyro3f19
					5'-ATAAGTGAGTTATAAAAGG-3'
miR-199A2	ENSG00000208024	ACTCAAGGGCTGTGATTTCCAGTCTTGACGTGGCACATTTGCTGCAGACTGGGGAACTGGCAATGAATTTAGGACCAGGAAAAGGGGGAGGGCTGGGCTGGAGAGTCCATATATGGGATGATGTCACCCTGGGGAGGTTTGGGTATGCGCTGTGCCGCTGGAGAGACCGCTAGAATCGCCTGCTCTCAGACATGGGTCTGTGCATAAAATGGT	cg24002149	MIR199-A2_406f25	MIR199-A2_AMP1_pyro1f20
			cg21450888	5'-ATTTAAGGGTTGTGATTTTTAGTTT-3'	5'-GTTGTGATTTTTAGTTTTGA-3'
			cg17178220	MIR199-A2_618_9r28	MIR199-A2_AMP1_pyro2f18
				Biotin-5'-ACCATTTTATACACAAACCCATATCTAA-3'	5'-GGGATGATGTTATTTTGG-3'
CHST2	ENSG00000175040	GGGGTTTCGTATGTGGGGTATARTGAAATAAGAGTAGTTTCGGTTAGAGGTTTAGTAAAGCGGAAAGACGGTTTCGTTCGTATATTTTTTCGKAAAATTGAAGCGTTTTTTTTGATTTTTAAGGTTAGAAAGATTTATTATTTTTTTCGAGAGGGCGTAGTTATAGATTTATTAGAGAGGGCGGGTAGGGTGTCGGAAGTTAGAGAACGGCGTTTCGCGTTTTTTTATCGTTTTAGGGCGTAGAGGTGTTTTTAGTGTTCGGAGAGGTTGGTAGTG	cg19442495	CHST2_354f20	CHST2_AMP1_pyro1f19
			cg19788429	GGGGTTTYGTATGTGGGGTA	GGTTAGAGGTTTAGTAAAG
				CHST2_629_9r21	CHST2_AMP1_pyro2f20
				Biotine-CACTACCAACCTCTCCRAACA	TTTTTAAGGTTAGAAAGATT
SOCS3	ENSG00000184557	GGTAGGGAGGGGATAGGAGAAGTTCGAAGGTTTTAGTCGGAGTATTTCKGGAATTTGGGATTTTCGGTTTTTATTCGTTTTGTTTTTATTTCGTTATTTTTTTGTCGGGAATGATTCGGGAAGGGGAGGGGAAATCGGGAAAAGTTTTCGGGATTGAGCGAGATTTTTTTTTACGTCGCGTTTTTTTTTTTTATTTGGTTTCGAATCGAAGTTTTCGTTTTTGGGGTTGAGTTTTT	cg19894975	SOCS3_371f23	SOCS3_AMP1_pyro1f18
			cg26747885	GTAGGGAGGGGATAGGAGAAGTT	GAGGGGATAGGAGAAGTT
				SOCS3_606_9r21
				Biotine-AAAAAACTCAACCCCAAAAAC
PCSDHB15	ENSG00000113248	GGGGATGGTAGGAAATATTTAGAGTTGGTGTTGGATATAGAATTGGATCGCGAGGAGTAGGTCGAGTTTHGATTAATTTTGATAGCKGTGGACGGTGGTTTTTTATTTCGATTTGGTATCGTTTAGATTTTTATTTTGGTTTTGGACGTTAAWGATAATGTTTCGGAGTTTGTGTAGGCGTTTTACGAGGTGTAGRTTTTAGAGAATAGTTTAGTAGGTTTTTTAGTTGTTAAGGTTTTYGTTAGGGATTTAGATATTGGGATAA	cg27328673	PCDHB15_399f25	PCDHB15_AMP1_pyro1f20
			cg23974473	GGGGATGGTAGGAAATATTTAGAGT	TGGTGTTGGATATAGAATTG
			cg09135656	PCDHB15_663_9r25
				Biotine-TTATCCCAATATCTAAATCCCTAAC
PCDHB16	ENSG00000196963	TTTTTTAGGAAAGTGTATTTTTTTTTTGTAGGTGGTGGACGTGAATGATAATTTTTTATAGKTGATTATGTTTGTATTTATTAGTTTTATTTTAGAGAATTCGTTTGAGATAGTAGTTGTTGTTTTTAGCGTTTTAGATTTTGATTTCGGAAATAATGGGAAGACGATTTTTTTTATTTAGGAAGATTTTTTTTTTTTTTTAAAATTTTTAGTTAAGAATTTTTATATTTTGGTAACGGAGAGAGTATTCGATAGAGAAGTAAGAGTTGAATATAATATTATTTTTATCGTTATAGATATGGGGATTTTAAGGT	cg00269800	PCDHB16_372f25	PCDHB16_AMP1_pyro2f20
			cg01248745	TTTTTTAGGAAAGTGTATTTTTTTT	TTATTAGTTTTATTTTAGAG
			cg20730770	PCDHB16_685_9r25
				Biotine-ACCTTAAAATCCCCATATCTATAAC
MYH1	ENSG00000109061	TTTATATTGGGTTAAGTATATGAATTAATTTTTTATAAATRATTTGAGTCGTTGGTAATTTTAAAGTTGTTGGTTTTTGGAATGTAAGGTGTTGTTTTAAAGATAGTTAAGTTTTGGAATTTTTGGATTTTGTTGTTTATTGTTTTTTTGTTTTATAGAGTCGTTTGTGTGAAGTTTTTTTAATTGTTTGYGTAGTTATAGATAGTGTATTCGGGAGGAAAATTTTTGTTTTTTAGT	cg25650956	MYH1_512_9f30	MYH1_AMP1_pyro1r17
			cg16842280	Biotine-TTTATATTGGGTTAAGTATATGAATTAATT	AAAAACAAAAATTTTCC
				MYH1_748r25
				ACTAAAAAACAAAAATTTTCCTCCC
RAC3	ENSG00000109061	TTTGGTTTATTTGGAGGATAAGTTGAGATTGTTGGCGTAGGTACGGGACGAGGCGTAGGGCGTTTGTTTATAGTAGAAGTAGGTGGTGGTCGAGGTTTHGATTCGGGTTAGTTAGTTGGGTTTGTAAGTTGAGGGTTTGCGGCGGCGTTTGGAAGAGTTGTAGTAGGTAGGCGGGGTTTCGGTGGGGGGTTTCGGGCGTGTTAGTTTTTAATTTTCGTTTTATTTTTTAGTTTTCGTGTTTGGTAGGAGTTGAGTTTTAAGGATTAGGAAAGGGTG	cg08170637	RAC3_422f25	RAC3_ AMP1_pyro2f17
				TTTGGTTTATTTGGAGGATAAGTTG	GGTTTGTAAGTTGAGGG
				RAC3_697_9r25
				Biotine-CACCCTTTCCTAATCCTTAAAACTC
Mir-1908	ENSG00000222326	TTTTGGGTTGTGTAAGGTAAGGTTTATGGCGATAAGATTTACGTTGGTAGGTTCGGTAGTTTCGGGTTTTGTAAGTGATGCGGCGTGTGGGGCGGGGGTCGGGGCGGAGTCGGCGGTCGGTGGTATTATATATACGGATTAATCGTCGTTTTCGTCGCGGTATTTTCGGTTTTAAATTATATTGCGGGAAGTTTTAGCGTTGGTGTTTGTTTCGTTTGCGTATGCGTCGGGATACGTTTGCGTTTTTGGTCGTAGTTAGGGTTTTCGAGTGGTTATTTTGGTTGATT	cg14725641	MIR1908_242f29	MIR1908_AMP1_pyro3f17
			cg03735013	TTTTGGGTTGTGTAAGGTAAGGTTTATGG	GGTTTTAAATTATATTG
			cg25326896	MIR1908_528_9r21
			cg12517394	Biotine-AATCAACCAAAATAACCACTC
			cg09677638
HOXB2	ENSG00000173917	TTTTTATAATTGTATATTGTTGATAAATATAAGCGTATGGGGATTTTTTTTATTAAATTTAGGATTTTAGCGAAATTATAGGGAATTCGTGGTTACGGGATCGGTTTTCGTTAATCGTTCGTTTGGGTTTGGTGGAAAATAGAGAGTATTATTTGGTTTAATTGATTTAAAAATATTAGAGGATTACGATTAGGATATTATGAGTTTTTATTTTTATATTAGTGTTTTATATGTTTTTTTTTTAATGTTTTCGTTTTTTTAGAAAAGTTAGAGGAATTTTTTTTTTATTTTTTTCGAAGG TTAGAAGGTTTTAGAAGTTTGGAAAAGAAGAGAT	cg26841048	HOXB2_179f30	HOXB2_AMP1_pyro1f20
			cg09313705	TTTTTATAATTGTATATTGTTGATAAATAT	ATATTGTTGATAAATATAAG
			cg22777724	HOXB2_512_9r27	HOXB2_AMP1_pyro3f18
			cg22807449	Biotine-ATCTCTTCTTTTCCAAACTTCTAAAAC	AAATAGAGAGTATTATTT
			cg23530553		HOXB2_AMP1_pyro4f20
			cg06942183		ATTTTTATATTAGTGTTTTA
			cg10381440
