# Supplementary material for: DNA methylome combined with chromosome cluster-oriented analysis provides an early signature for cutaneous melanoma aggressiveness
Source: eLife. 2022 Sep 20;11:e78587. doi: 10.7554/eLife.78587 (PMC9525058; doi:10.7554/eLife.78587)
Supplement: Supplementary file 3. [file elife-78587-supp3.xlsx]

## Sheet: score
sample	OVS month	Methylation score
MEL 1	0.492813	2
DARDI	2	3
MEL 16	2.49692	2
ARQHU	3	1
MEL 15	3.02259	3
MEL 8	4.86242	0
DUCYV	5	3
12972.1	6	3
12973	6	1
CoRa	6	1
ClSp	6	0
RONYA	7	4
MEL 20	7.49076	2
FR-12	8.14783	1
LEOJE	9	2
LEFPA	9	1
FR-11	11.6961	2
MEL 11	14.2259	1
CaGi	16	0
12967	18	1
ARNCO	19	1
MEL 6	19.1869	0
FR-9	19.2526	1
FR-14	20.8624	1
FR-15	25.6263	2
FR-16	25.6263	2
FR-63	28.4517	1
MEL 5	31.3429	0
MEL 7	33.1499	1
MEL 14	47.9014	0
FR-8	50.9897	1
FR-13	51.4825	1
BOUAN	60	1
MEL12	61.076	1
FR-65	66.6283	1
MEL 18	68.0739	1
MEL17	68.6653	0
MEL 13	69.3552	0
MEL 2	70.5051	0
FR-64	72.8049	1
MEL9	73.5934	0
MEL 19	74.1848	0
MEL 10	82.7269	1
12969	84	2
MEL 4	90.6119	0
MEL 3	98.694	0
BoCl	102	0
BrSi	108	1
FR-10	218.382	1
